# Supplementary material for: Microfluidic Formulation of Curcumin-Loaded Multiresponsive Gelatin Nanoparticles for Anticancer Therapy
Source: PubMed Central journal article supplement (PMC10265577; doi:10.1021/acsbiomaterials.3c00318), 2023-05-04
Supplement: ab3c00318_si_001.pdf [file ab3c00318_si_001.pdf]

# Supporting Information

## Microfluidic formulation of curcumin loaded multi-responsive gelatin nanoparticles for anticancer therapy

Yu Xia<sup>1,4</sup>, Ruicheng Xu<sup>1,4</sup>, Siyuan Ye<sup>1</sup>, Jiaxuan Yan<sup>1</sup>, Piyush Kumar<sup>2</sup>, Peng Zhang<sup>3</sup>,

Xiubo Zhao<sup>1,2, \*</sup>

<sup>1</sup>School of Pharmacy, Changzhou University, Changzhou 213164, China

<sup>2</sup>Department of Chemical and Biological Engineering, University of Sheffield, Sheffield S1 3JD, UK

<sup>3</sup>School of Materials Science and Engineering, Changzhou University, Changzhou 213164, China

<sup>4</sup>The authors contribute equally to this paper.

\*Author for correspondence: E-mail: xiubo.zhao@cczu.edu.cn

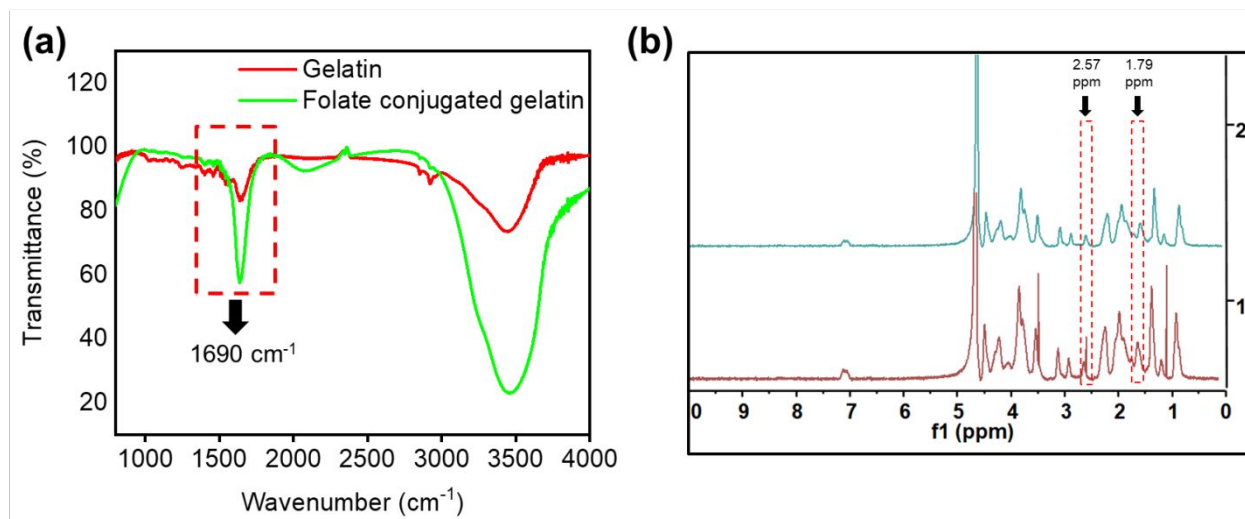

**Figure S1.** (a) FTIR spectra of gelatin (green) and folate conjugated gelatin (red). (b) <sup>1</sup>H NMR spectra of gelatin (A) and folate conjugated gelatin (B) in D<sub>2</sub>O solvent.

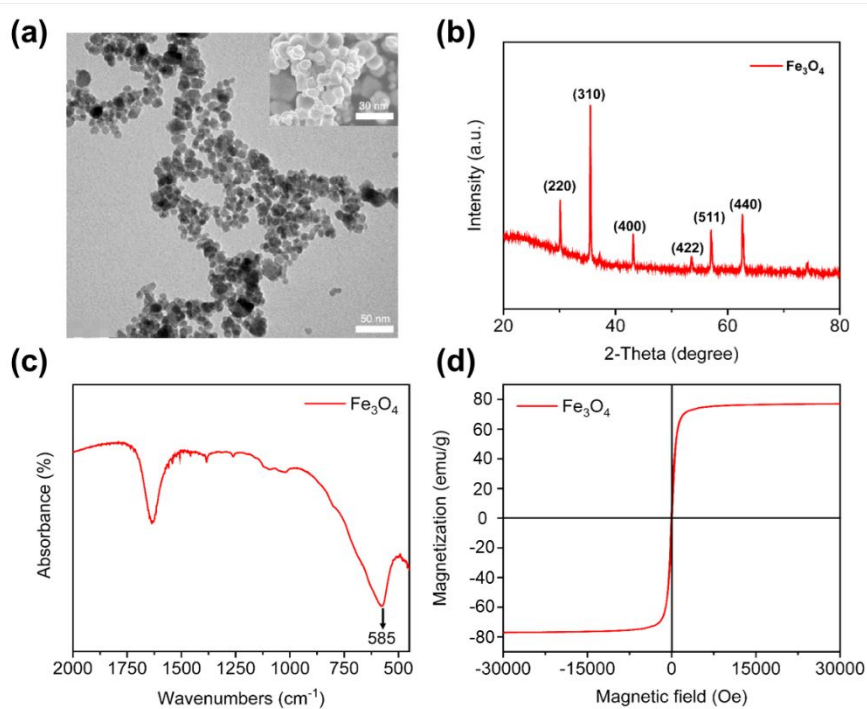

**Figure S2. Characterization of Fe<sub>3</sub>O<sub>4</sub> nanoparticles. (a)** Transmission electron microscopy image of Fe<sub>3</sub>O<sub>4</sub> with the SEM image inserted. **(b)** XRD patterns of Fe<sub>3</sub>O<sub>4</sub>. **(c)** FTIR spectrum of Fe<sub>3</sub>O<sub>4</sub>. **(d)** Magnetization curve of superparamagnetic Fe<sub>3</sub>O<sub>4</sub> NPs.

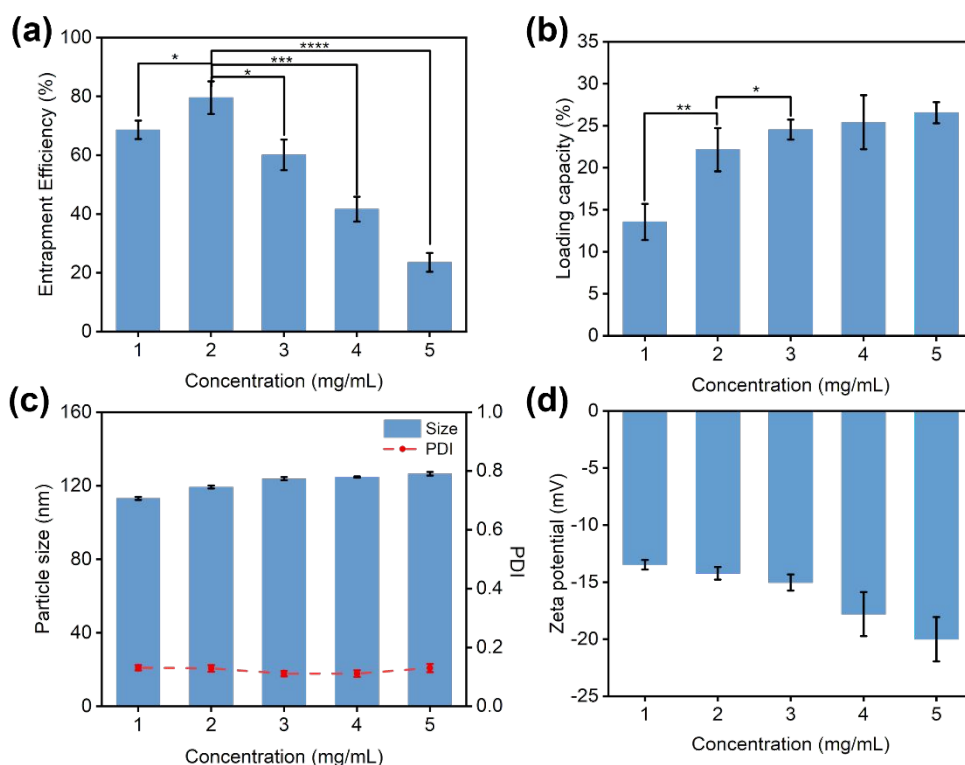

**Figure S3. Effect of curcumin concentration on drug entrapment efficiency, particle size, PDI and Zeta potential. (a)** EE%. **(b)** LC %. **(c)** Particle size and PDI. **(d)** Zeta potential.

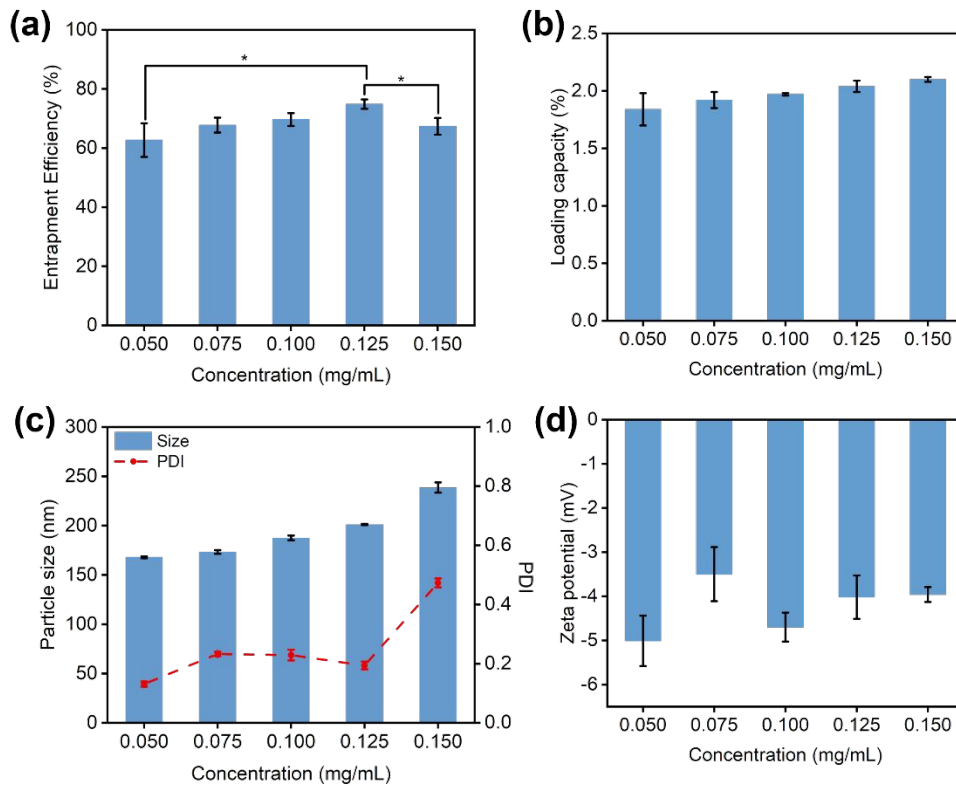

**Figure S4.** Effect of CuS concentration on CuS entrapment efficiency, particle size, PDI and Zeta potential. (a) EE%. (b) LC %. (c) Particle size and PDI. (d) Zeta potential.

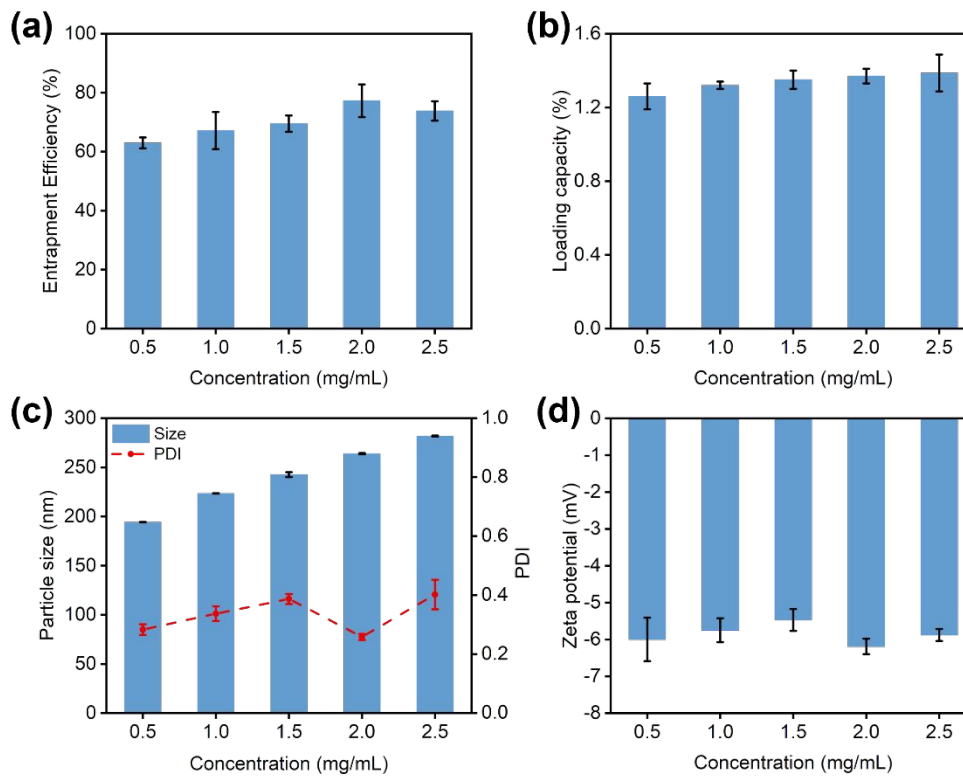

**Figure S5.** Effect of Fe<sub>3</sub>O<sub>4</sub> concentration on Fe<sub>3</sub>O<sub>4</sub> entrapment efficiency, particle size, PDI and Zeta potential. (a) EE%. (b) LC %. (c) Particle size and PDI. (d) Zeta potential.

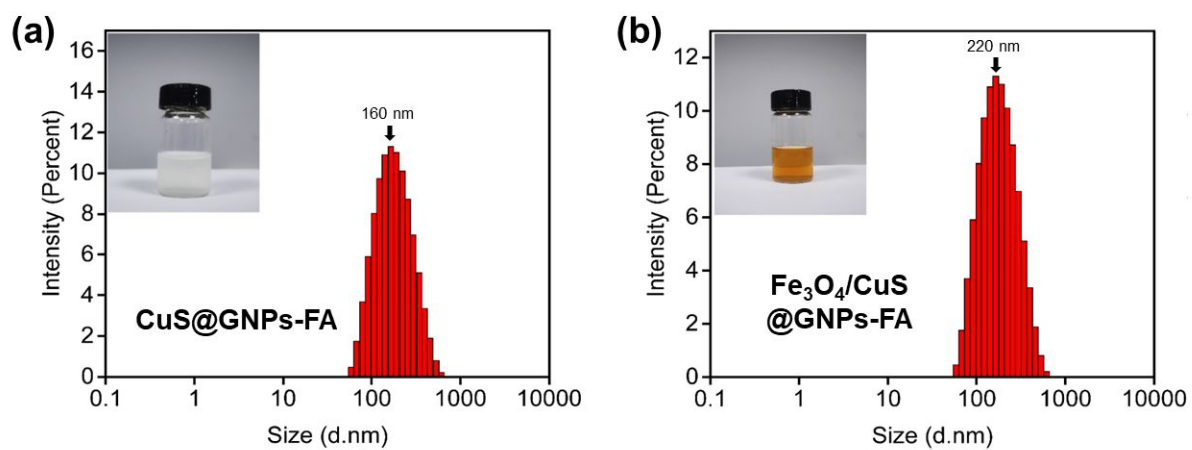

**Figure S6.** Size distribution of (a) CuS@GNPs-FA and (b) Fe<sub>3</sub>O<sub>4</sub>/CuS@GNPs-FA.
